# Supplementary material for: Dynamically cell separating thermo-functional biointerfaces with densely packed polymer brushes
Source: Royal Society of Chemistry journal article supplement (doi:10.1039/c2jm31797d), 2012-01-01
Supplement: c2jm31797d.pdf [file c2jm31797d.pdf]

## Dynamically Cell Separating Thermo-functional Biointerfaces with Densely Packed Polymer Brushes

Kenichi Nagase,<sup>a</sup> Ayaka Kimura,<sup>a,b</sup> Tatsuya Shimizu,<sup>a</sup> Katsuhisa Matsuura,<sup>a</sup>

Masayuki Yamato,<sup>a</sup> Naoya Takeda,<sup>b</sup> and Teruo Okano<sup>a\*</sup>

- a. Institute of Advanced Biomedical Engineering and Science, Tokyo Women's Medical University (TWIns) 8-1 Kawadacho, Shinjuku, Tokyo 162-8666, Japan.
- b. Department of Life Science and Medical Bioscience, School of Advanced Science and Engineering, Waseda University (TWIns), 2-2 Wakamatsucho, Shinjuku, Tokyo 162-8480, Japan.

AUTHOR EMAIL ADDRESS: tokano@abmes.twmu.ac.jp

### Methods

#### Measurement for calibration curve of grafted amount of PIPAAm

Poly(*N*-isopropylacrylamide)(PIPAAm) (Mn: 11200, Mn/Mw: 1.40) prepared by ATRP were dissolved in 2-propanol and methanol mixed solvent (2-propanol: methanol = 9: 1) at predetermined concentrations (0.115 g/L, 0.230 g/L, 0.461 g/L, and 0.691 g/L for 0.5  $\mu\text{g}/\text{cm}^2$ , 1.0  $\mu\text{g}/\text{cm}^2$ , 2.0  $\mu\text{g}/\text{cm}^2$ , and 3.0  $\mu\text{g}/\text{cm}^2$ ). The solutions (25  $\mu\text{L}$ ) were casted onto glass coverslips (24 x 24 mm, 0.2 mm in thickness) (Matsunami Glass, Osaka). Solvent of PIPAAm solution was volatilized for overnight. The peak intensity ratio of  $I_{1650} / I_{1000}$  of the prepared PIPAAm casted cover glasses were measured by an attenuated total reflection Fourier transform infrared spectroscope (ATR/FT-IR) (Nicolet 6700) (Thermo Fisher Scientific) and prepared a calibration curve for determining the amount of PIPAAm on glass substrate.

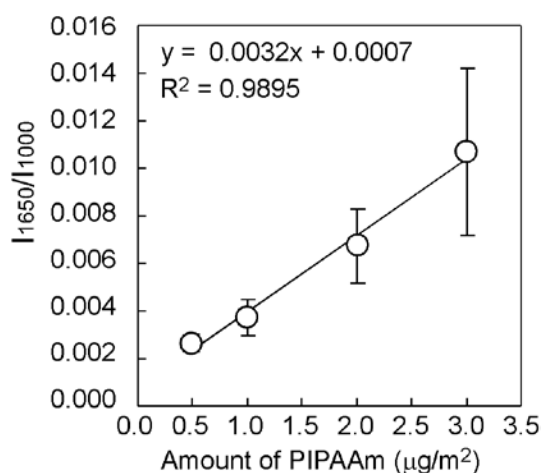

**Fig. S1.** Calibration curve for determining the grafted amount of PIPAAm on glass substrate. The y-axis represents the intensity ratio of peaks at 1650 and 1000  $\text{cm}^{-1}$  in ATR/FT-IR spectrum.
